# Supplementary material for: Conformational analysis and potential anticancer activity of [Pt(phen)(L1-κS)2] studied by single crystal X-ray diffraction and variable temperature1H and195Pt NMR spectroscopy
Source: Royal Society of Chemistry journal article supplement (doi:10.1039/c8nj06010j), 2019-01-01
Supplement: c8nj06010j1.pdf [file c8nj06010j1.pdf]

# Conformational analysis and potential anticancer activity of [Pt(phen)(L<sup>1</sup>-κS)<sub>2</sub>] studied by single crystal X-ray Diffraction and Variable Temperature <sup>1</sup>H and <sup>195</sup>Pt NMR Spectroscopy. †

Edmore F. Kangara<sup>a</sup>, Tebogo Peega<sup>a</sup>, Leonie Harmse<sup>b</sup>, Juanita L. van Wyk<sup>a</sup>, Demetrius C. Levendis<sup>a</sup>, Izak A. Kotzé<sup>a\*</sup>

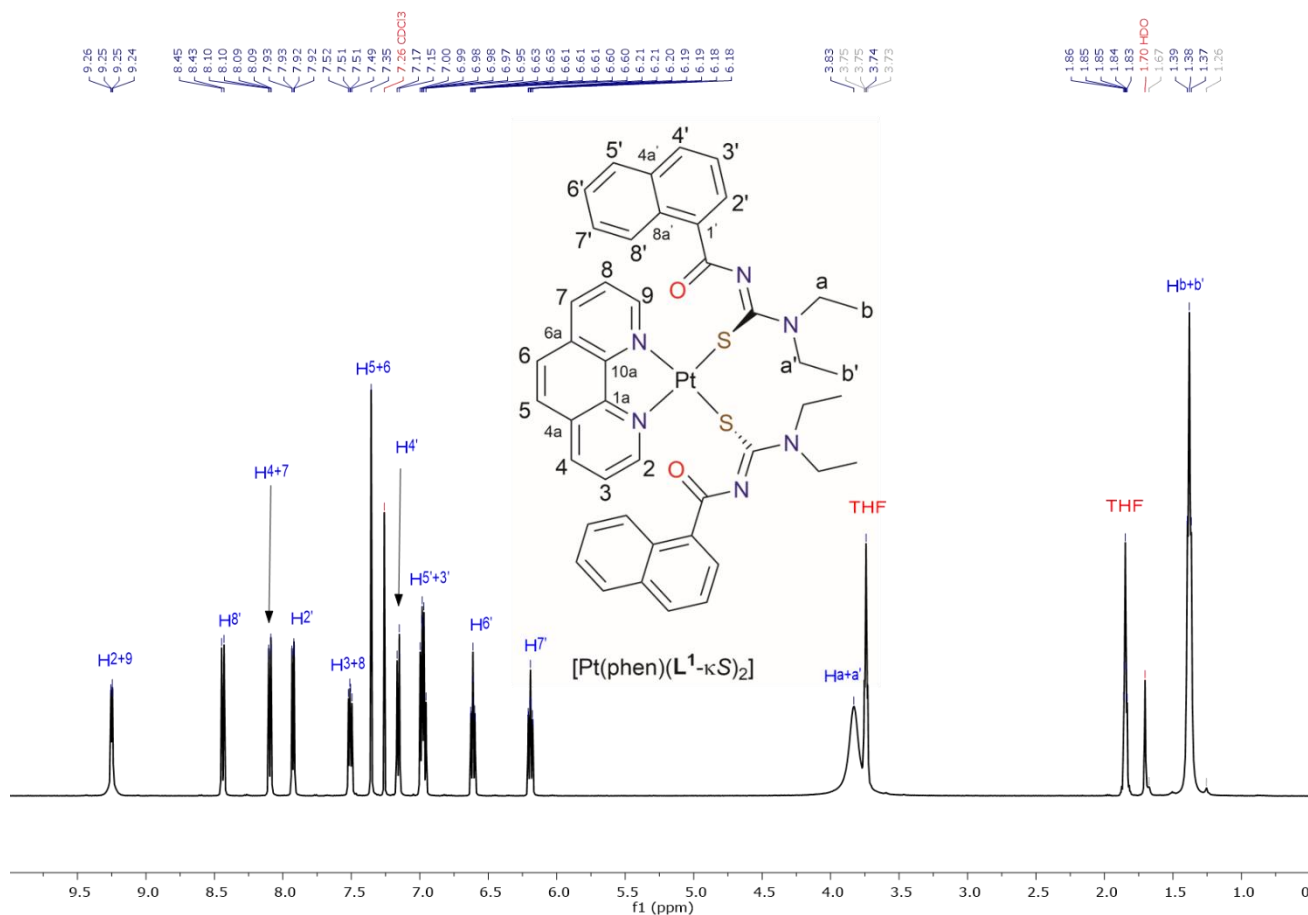

Figure S1: Full proton assignments in the <sup>1</sup>H NMR spectrum of [Pt(phen)(L<sup>1</sup>-κS)<sub>2</sub>] in CDCl<sub>3</sub>

<sup>a\*</sup> Molecular Sciences Institute, School of Chemistry, University of the Witwatersrand, Johannesburg, 2050, South Africa. E-mail [izak.kotze@wits.ac.za](mailto:izak.kotze@wits.ac.za).

<sup>b</sup> Division of Pharmacology, Department of Pharmacy and Pharmacology, Faculty of Health Sciences, University of the Witwatersrand, 7 York Road, Parktown, 2193, South Africa.

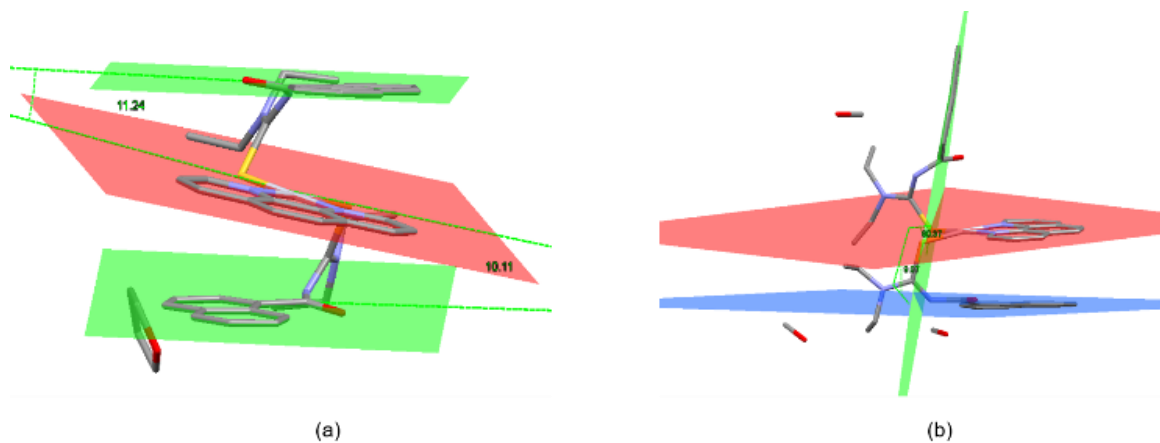

Figure S2: Orientation of naphthyl rings of the acylthioureato ligands with respect to the phenanthroline ring in the two solvates (a) Form I and (b) Form II respectively.

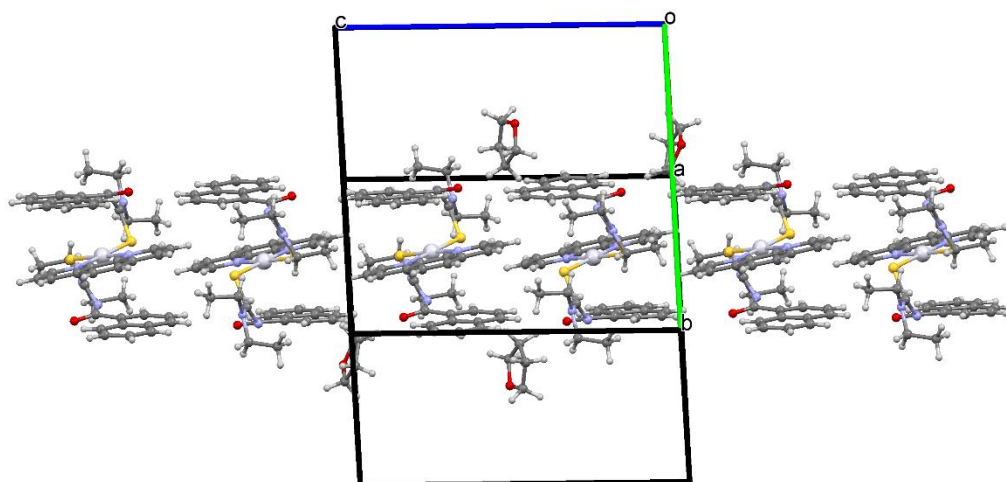

Figure S3(a). Projections of crystal structure showing one-dimensional packing for the Form I solvate.

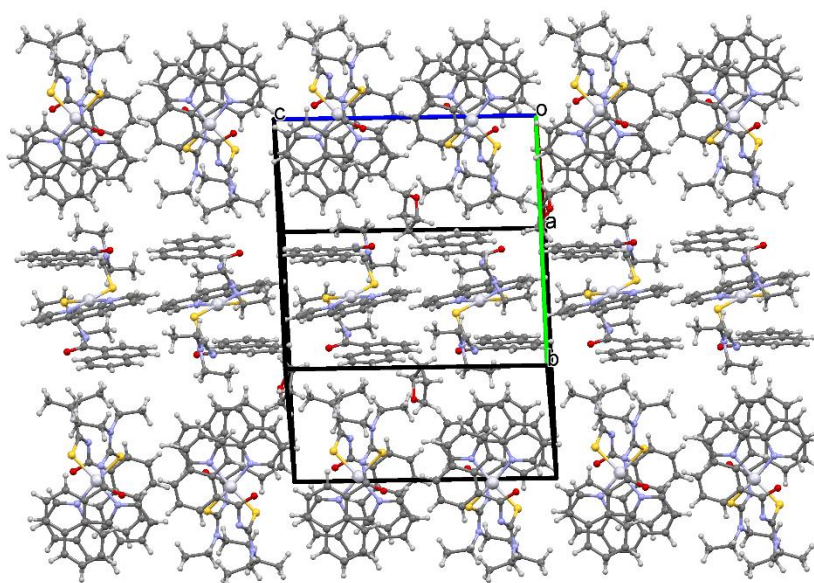

Figure S3(b). Projections of crystal structure showing two-dimensional packing for the Form I solvate (with one-dimensional ribbons arranging alternately perpendicular to each other).

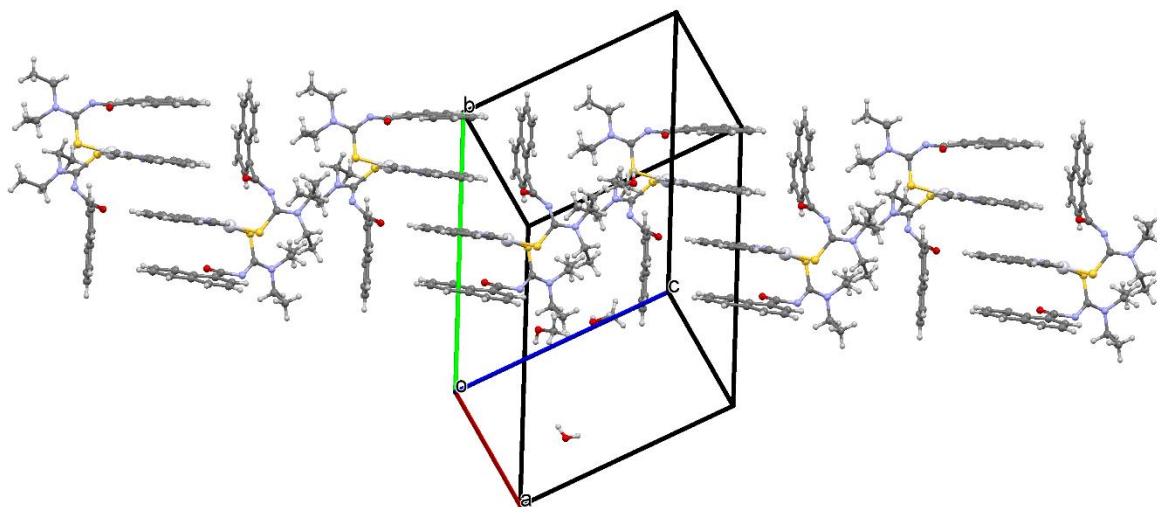

Figure S4(a). Projections of crystal structure showing one-dimensional packing for the Form II solvate.

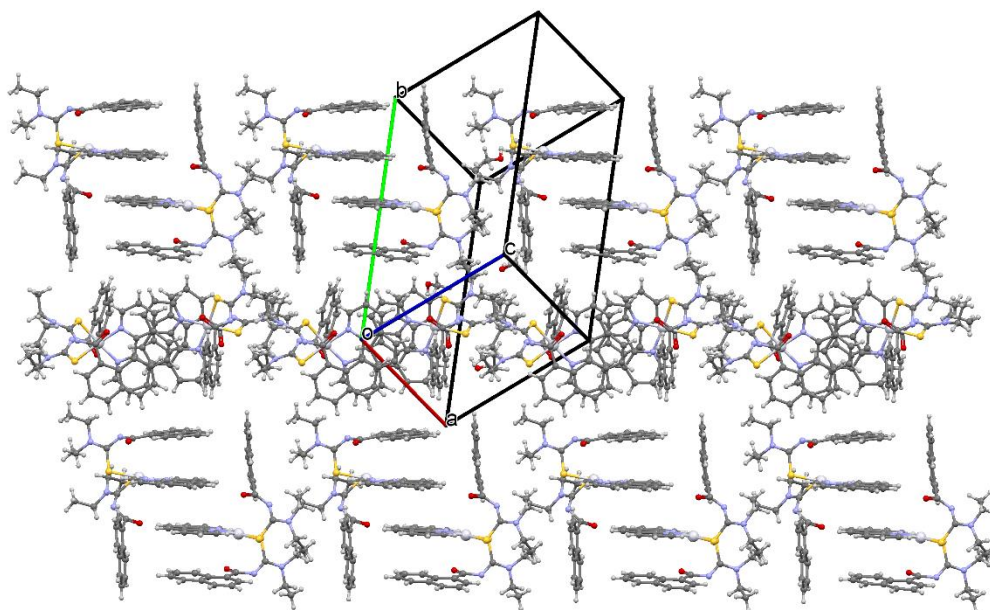

Figure S4(b). Projections of crystal structure showing two-dimensional packing for the Form II solvate (with one-dimensional ribbons arranging alternately perpendicular to each other).

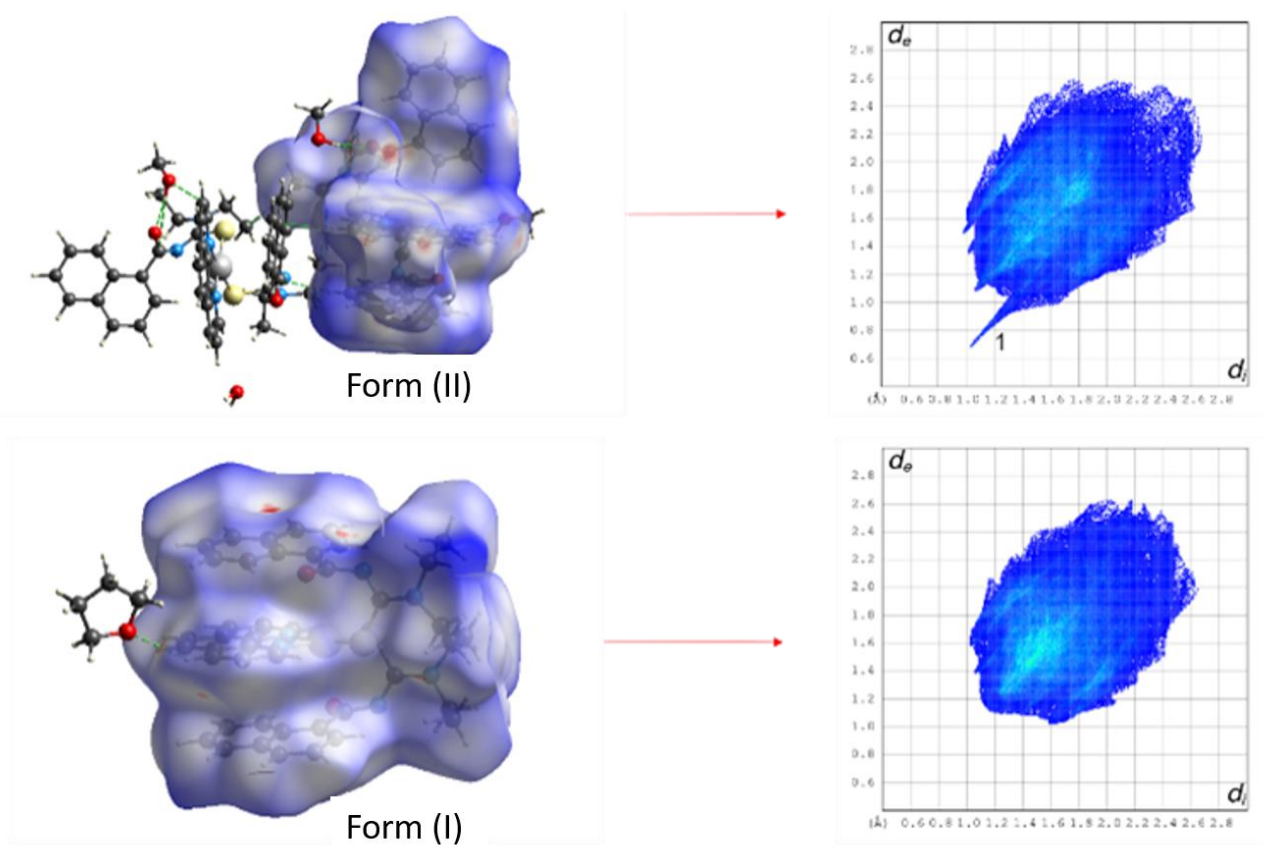

Figure S5. Hirshfeld surfaces and 2D fingerprint plots for the two solvates Form I and Form II.

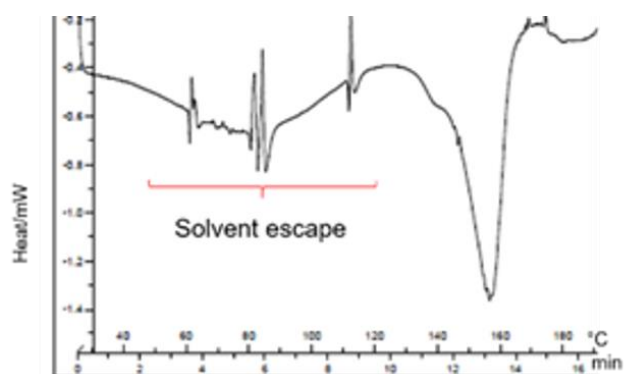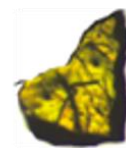

Form (II)

Melting point = 159,96°C

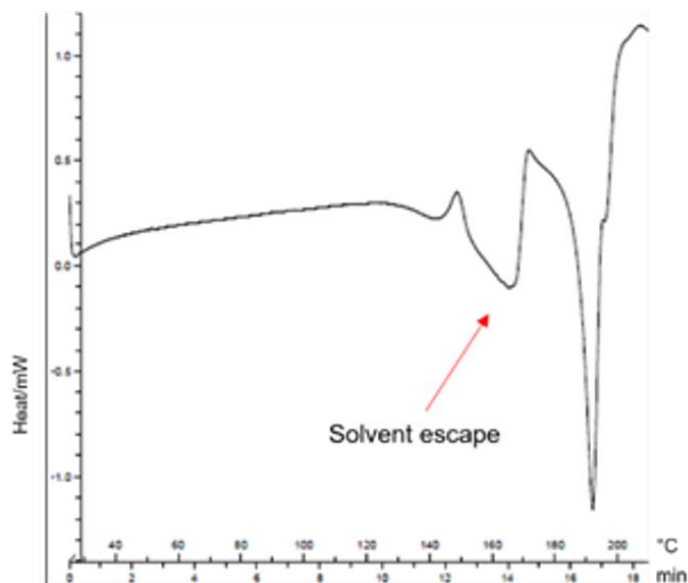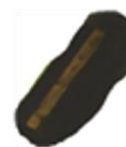

Form (I)

Melting point = 196,09°C

Figure S6. Differential scanning calorimetry (DSC) plots indicating the melting points for Form I and Form II

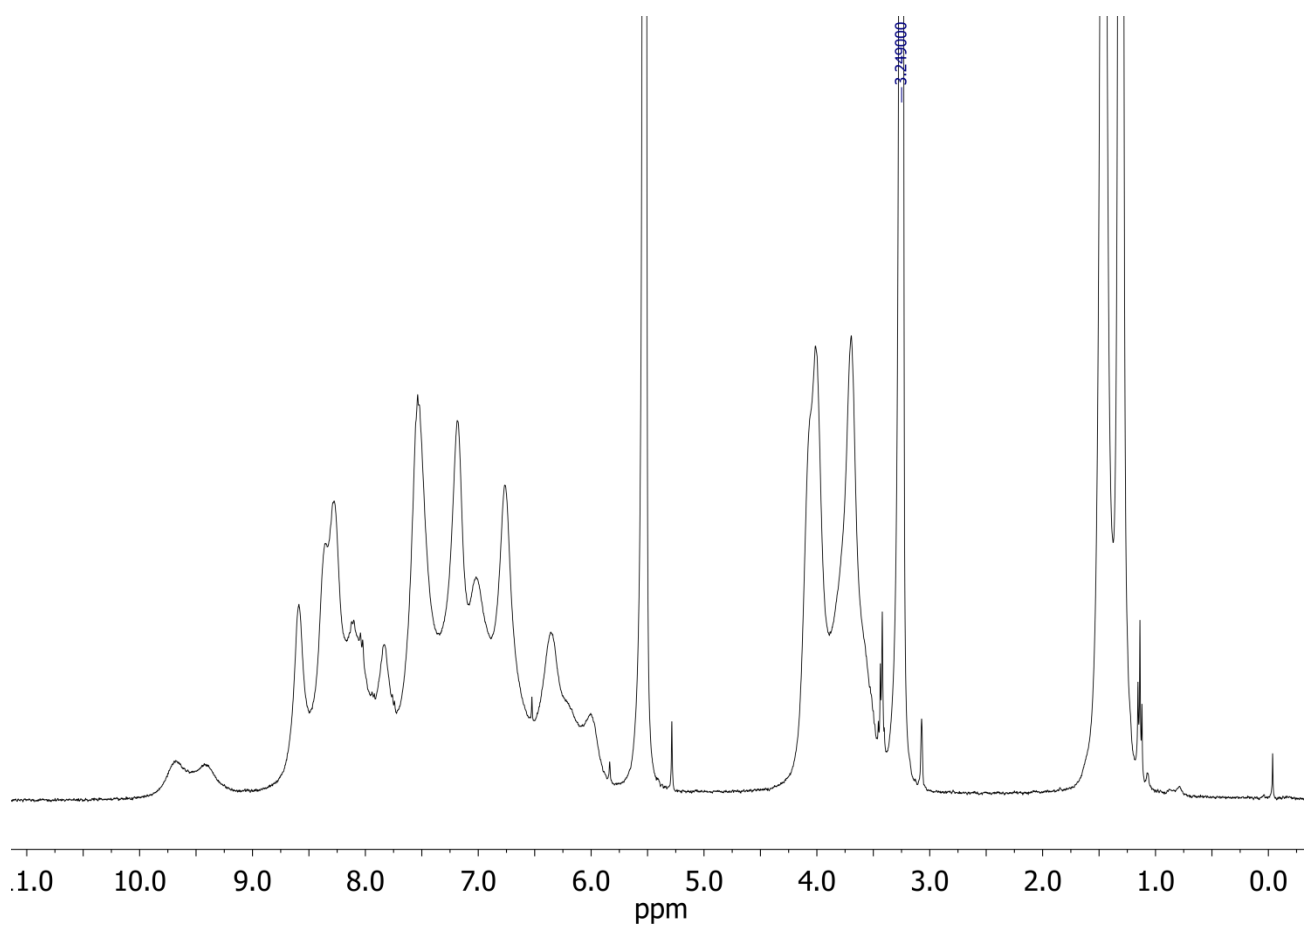

Figure S7  $^1\text{H}$  NMR spectrum of  $[\text{Pt}(\text{phen})(\text{L}^1\text{-}\kappa\text{S})_2]$  in  $\text{CD}_3\text{OD}$  recorded at  $-50\text{ }^\circ\text{C}$

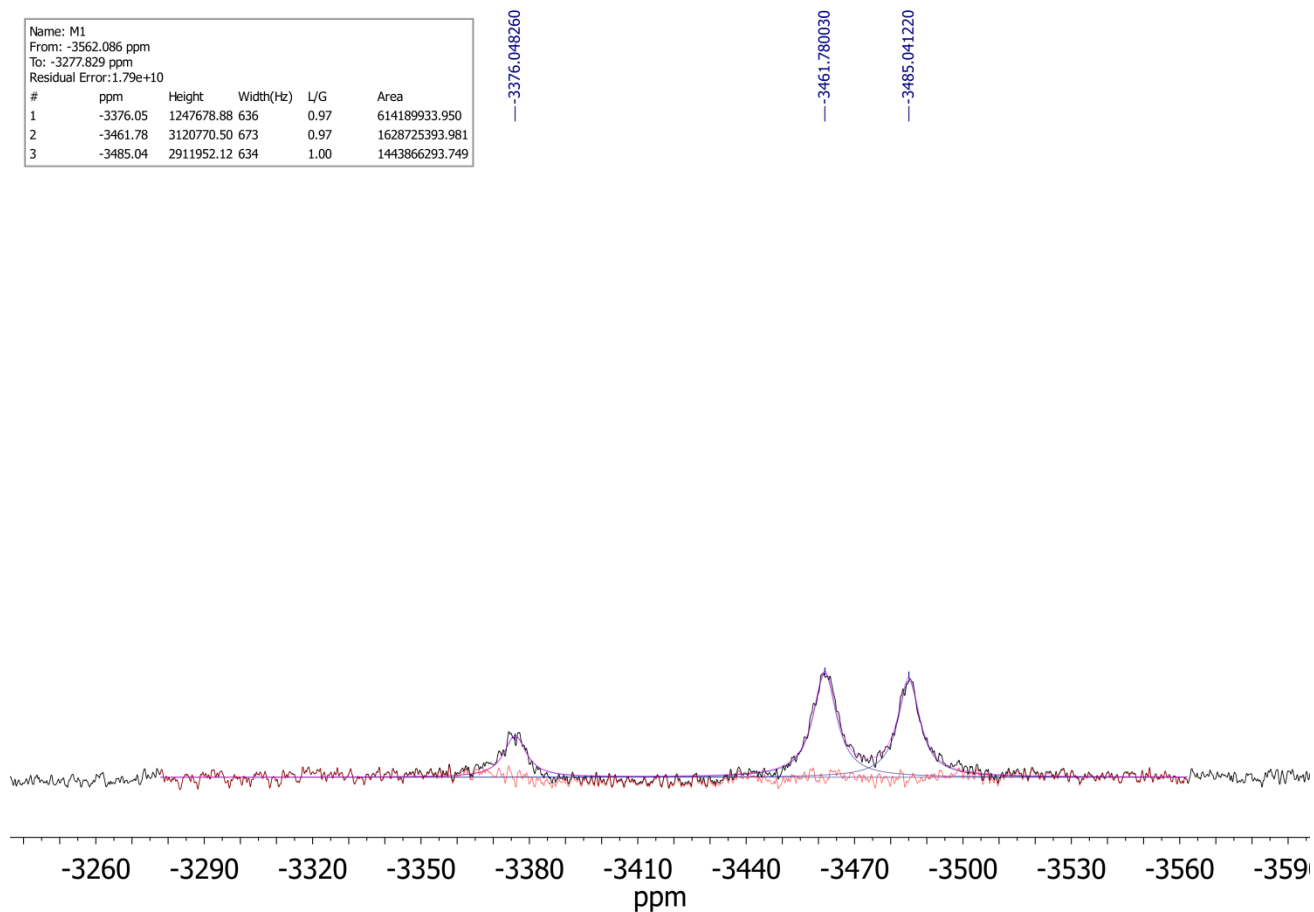

Figure S8:  $^{195}\text{Pt}$  NMR spectrum of  $[\text{Pt}(\text{phen})(\text{L}^1\text{-}\kappa\text{S})_2]$  in  $\text{CD}_3\text{OD}$  recorded at  $-50\text{ }^\circ\text{C}$  with peak fit areas



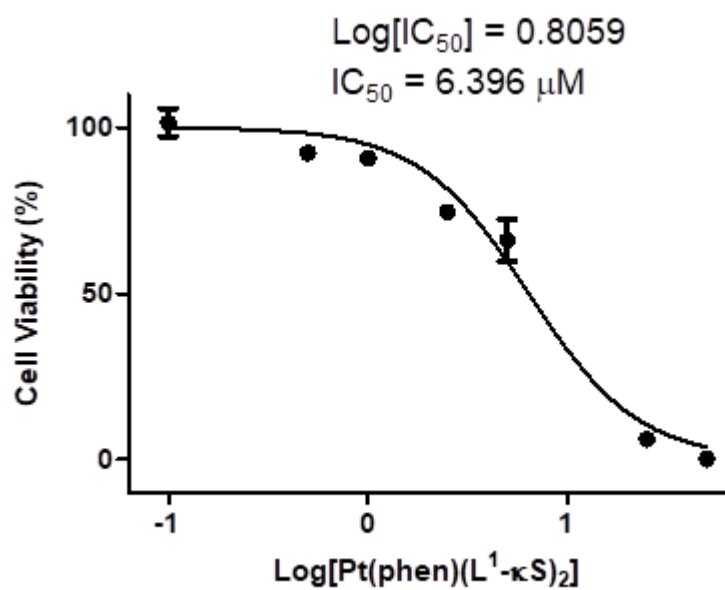

Figure S9. A representative dose–response curve of  $\text{Log}[\text{Pt}(\text{phen})(\text{L}^1\text{-}\kappa\text{S})_2]$  versus percentage cell viability of A549 cancer cell line treated for 46 hours.
